# Supplementary material for: Analysis of Conservation Gaps and Landscape Connectivity for Snow Leopard in Qilian Mountains of China
Source: MDPI journal article supplement (doi:10.3390/su14031638), 2022-01-30
Supplement: s1 [file s1]

Archive with 1 entries (1 files):
- sustainability-1566953-supplementary.pdf
