# Supplementary material for: Analysis of Conservation Gaps and Landscape Connectivity for Snow Leopard in Qilian Mountains of China
Source: MDPI journal article supplement (doi:10.3390/su14031638), 2022-01-30
Supplement: s1 [file s1 › sustainability-1566953-supplementary.pdf]

Figure S1. Land cover and the highways and railways distribution of study area.

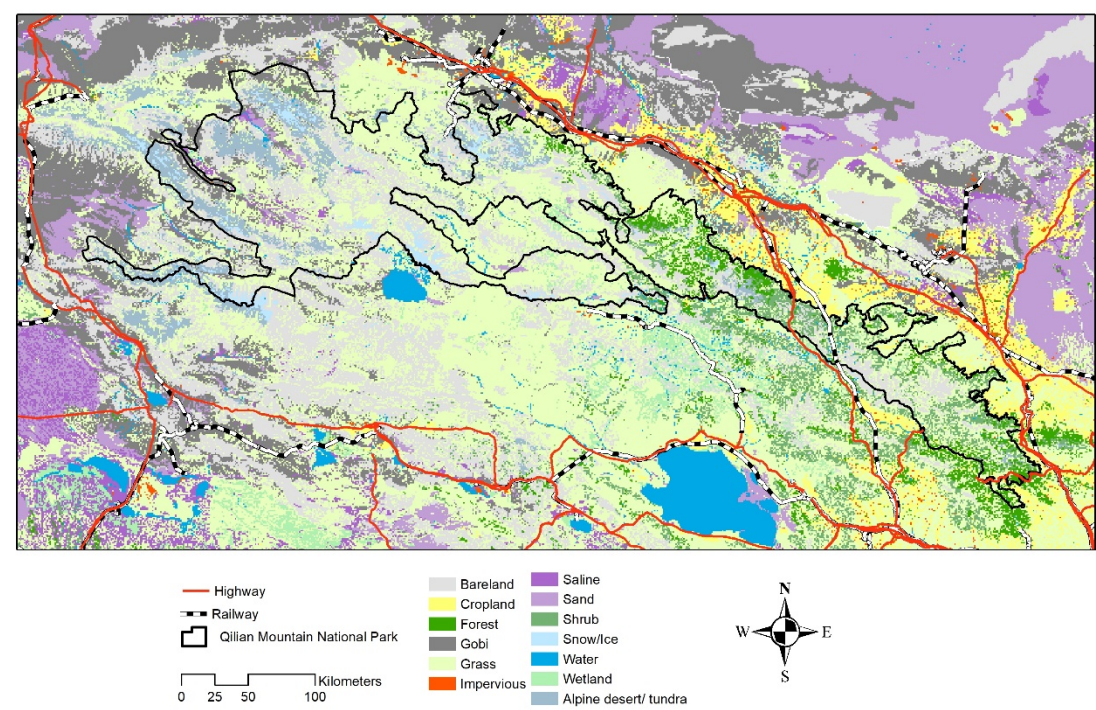

Figure S2. Response curve of selected variables for snow leopard habitat suitability modelling.

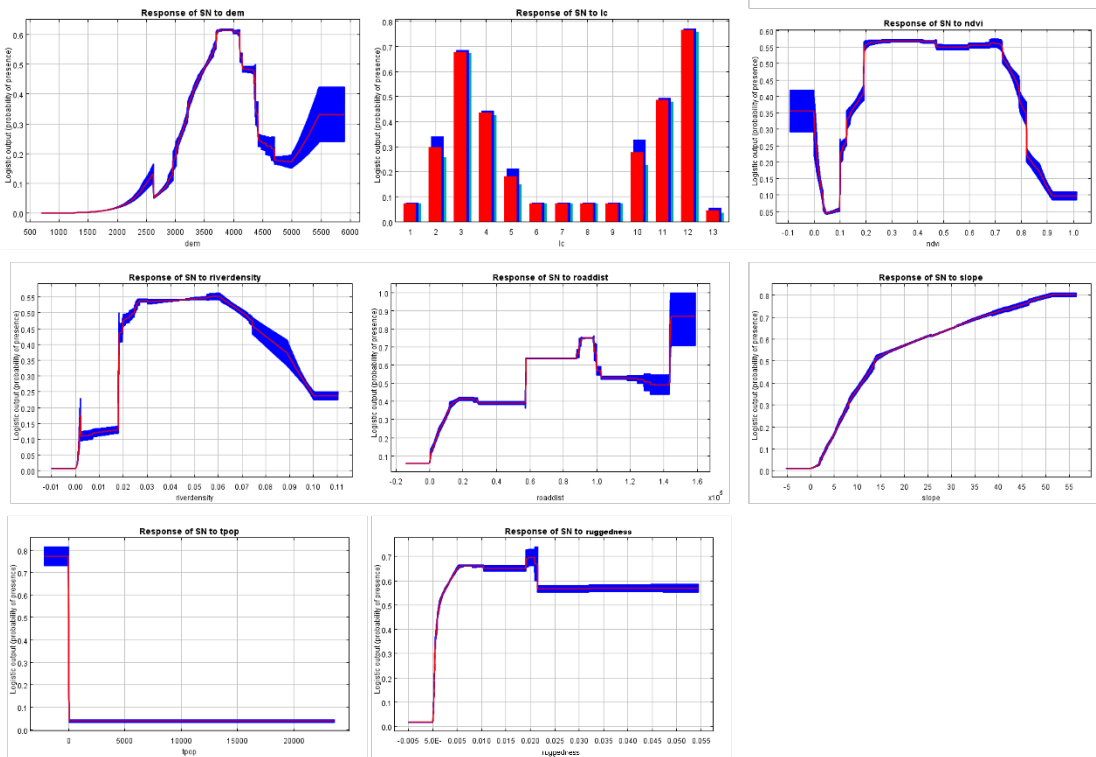

**Figure S3.** Habitat suitability modeled from Maxent for snow leopard.

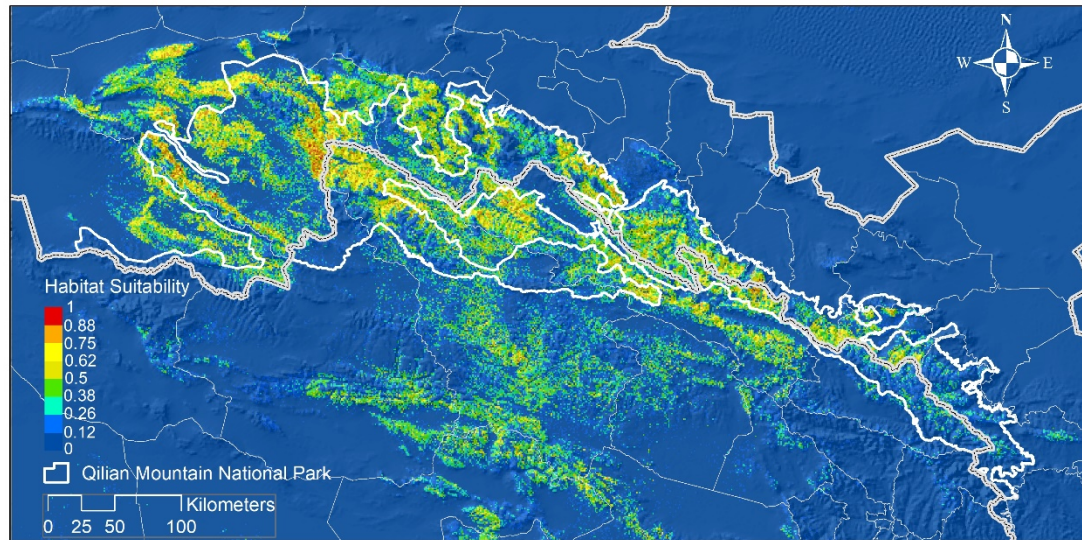

**Figure S4.** The resistance surface for the connectivity scenarios (a) the  $S_0$  scenario of connectivity in the study area which landscape resistance layer was derived from the habitat suitability index (b) the current scenario of connectivity as determined by superimposing the resistance of the highways and railways on the  $S_0$  (c) corridors construction scenario for (d) the G227 National Road and (e) the Lanzhou-Wulumuqi High-speed Railway to facilitate snow leopard dispersal between suitable habitats, and the corridor location were selected from areas with high habitat suitability index (Cost=1).

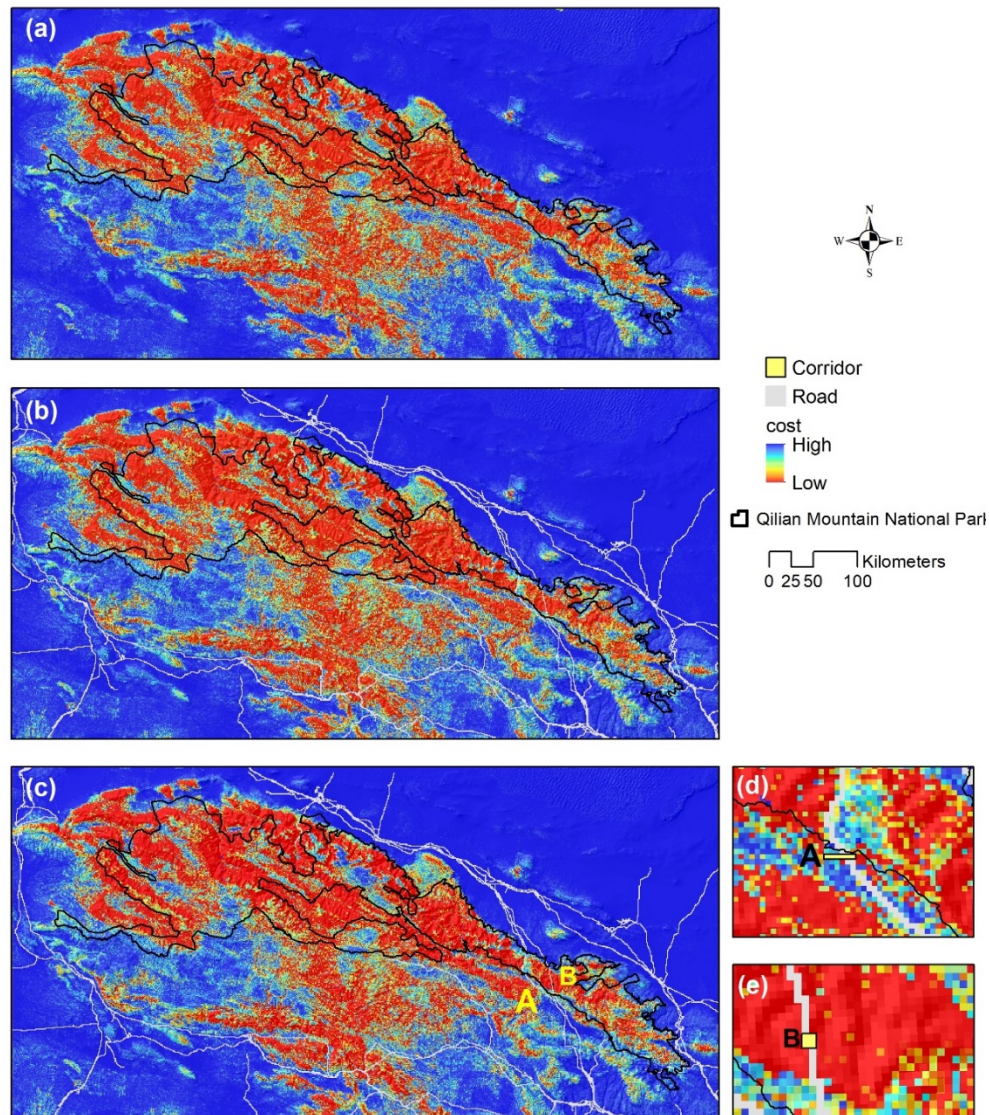

**Table S1.** The source of environmental variables.

| Environmental variables                                                   | Source of data                                                                                                 | Year |
|---------------------------------------------------------------------------|----------------------------------------------------------------------------------------------------------------|------|
| Normalized Difference<br>Vegetation Index (NDVI)                          | Resource and Environment Science and Data<br>Center( <a href="http://www.resdc.cn/">http://www.resdc.cn/</a> ) | 2018 |
| China Population Spatial<br>Distribution Kilometer<br>Grid Data Set (POP) | Resource and Environment Science and Data<br>Center( <a href="http://www.resdc.cn/">http://www.resdc.cn/</a> ) | 2015 |
| Land Cover                                                                | Resource and Environment Science and Data<br>Center( <a href="http://www.resdc.cn/">http://www.resdc.cn/</a> ) | 2018 |
| DEM                                                                       | WorldClim database( <a href="http://www.worldclim.org">http://www.worldclim.org</a> )                          |      |
| Road                                                                      | OpenStreetMap<br>database( <a href="https://www.openstreetmap.org/">https://www.openstreetmap.org/</a> )       | 2020 |
| River                                                                     | OpenStreetMap<br>database( <a href="https://www.openstreetmap.org/">https://www.openstreetmap.org/</a> )       | 2020 |

**Table S2.** Pearson's correlation of environmental variables

[illegible]
